# Supplementary material for: Tree-ring recorded variations of 10 heavy metal elements over the past 168 years in southeastern China
Source: Oxford University Press journal article supplement (doi:10.1525/elementa.2020.20.00075), 2021-01-01
Supplement: raw_data.xlsx [file raw_data.xlsx]

## Sheet: Sheet1
	Cr	Mn	Fe	Co	Ni	Cu	Zn	Sr	Cd	Pb	std
1848	56.3209	190.778	261.566	0.164985	0.631802	1.60918	20.4998	7.94791	0.133778	1.05846	0.968
1849	18.9547	214.715	86.4601	0.110698	0.296847	1.17389	23.1923	9.23364	0.153931	1.1593	0.726
1850	45.9587	166.998	187.547	0.122129	0.522442	1.5595	24.6954	7.93631	0.135699	1.13387	0.831
1851	16.0969	193.905	76.9911	0.0980004	0.282122	0.853656	18.2753	8.21853	0.135527	1.03697	0.908
1852	47.6039	188.467	205.73	0.139861	0.659271	1.5361	18.9914	8.28685	0.125902	1.15708	0.9
1853	58.9321	199.859	258.091	0.159501	0.568781	1.45841	17.2169	8.32036	0.1266	1.19257	1.065
1854	37.858	219.304	179.55	0.146143	0.510972	1.07304	22.0441	8.05959	0.137671	0.999441	0.949
1855	21.082	237.667	111.204	0.119266	0.363629	1.01138	18.108	8.6089	0.133048	1.09195	0.947
1856	18.0721	238.825	90.511	0.11207	0.31068	0.892532	21.0792	8.63292	0.15749	1.13226	0.957
1857	39.1707	181.047	173.861	0.152303	0.372384	1.22392	20.9333	7.83289	0.108601	1.42987	0.872
1858	27.827	170.941	133.528	0.157462	0.307685	0.912195	22.1471	7.80397	0.126332	1.9985	0.757
1859	35.1719	171.331	161.073	0.160478	0.368071	1.29445	21.9082	8.05187	0.125761	1.61044	0.771
1860	26.4046	141.208	123.656	0.126432	0.262885	1.40313	21.4089	7.44388	0.106392	1.68105	0.698
1861	28.5512	132.18	119.127	0.117502	0.29599	1.30199	21.7531	8.01012	0.120131	1.54672	0.72
1862	29.3147	177.094	141.479	0.156994	0.518695	1.4545	33.7356	9.62203	0.151607	2.08517	0.637
1863	15.7077	118.97	73.9028	0.0799367	0.147267	1.05035	19.9707	5.35519	0.0956949	1.03431	0.675
1864	8.39652	109.822	40.9922	0.0773437	0.200124	0.719833	18.0987	5.51846	0.0814279	1.1428	0.501
1865	10.1165	122.303	52.7517	0.0912879	0.186716	0.758629	21.4178	6.83496	0.104373	1.55915	0.602
1866	11.8364	134.785	64.5112	0.105232	0.173308	0.797426	24.7368	8.15146	0.127318	1.97551	0.573
1867	15.9718	118.911	83.1267	0.118341	0.208163	0.856374	26.1665	7.79399	0.108213	2.07683	0.684
1868	17.606	150.784	113.668	0.127843	0.23278	1.07308	21.505	8.42749	0.132903	2.4101	0.739
1869	26.5139	174.812	131.311	0.157741	0.379329	1.33436	23.0208	8.19072	0.181348	2.42433	0.705
1870	14.5531	160.659	58.5041	0.116993	0.117254	0.886474	17.7172	6.67748	0.155728	1.88	0.992
1871	30.2633	206.748	145.631	0.160034	0.295029	1.1627	17.493	6.30693	0.228892	1.47079	1.277
1872	46.0819	236.749	235.998	0.211346	0.637456	1.04017	20.31	6.65609	0.268389	1.45682	1.238
1873	31.9718	262.271	170.789	0.190866	0.35804	0.876866	23.2588	8.19952	0.263805	1.94327	0.961
1874	26.4077	248.419	134.58	0.182619	0.300909	0.945789	16.6465	6.70133	0.235517	1.39901	1.071
1875	21.5892	276.628	108.79	0.180014	0.361928	0.841422	26.9241	6.68522	0.250336	1.4697	1.017
1876	11.3218	324.65	62.5907	0.130986	0.373609	0.869838	29.7614	6.91739	0.179092	1.02697	1.125
1877	36.2089	263.255	177.075	0.180511	0.750811	0.832885	27.8956	6.16773	0.163357	1.24009	1.149
1878	21.4633	291.783	100.946	0.147486	0.427892	1.02226	30.1327	6.75029	0.195348	1.27145	0.855
1879	21.7552	269.644	105.936	0.155649	0.514375	0.954332	29.0028	6.35514	0.183425	1.39167	0.921
1880	21.753	230.916	113.767	0.146629	0.461224	0.811382	24.124	6.03858	0.149638	1.29504	1.092
1881	52.2039	247.136	272.764	0.218144	0.727145	1.21328	59.1256	6.00344	0.189109	1.35228	1.416
1882	66.2016	249.747	355.894	0.235367	1.01708	1.35783	25.2645	5.99629	0.203778	1.53053	1.238
1883	56.4987	238.87	299.991	0.224438	0.77692	1.51708	39.7312	6.16497	0.202328	1.55744	1.034
1884	59.8496	228.24	325.647	0.208822	0.911718	1.27995	21.2051	5.76129	0.184527	1.29906	1.487
1885	29.8121	222.525	159.812	0.166174	0.566046	0.942443	30.6981	5.14374	0.164855	1.20226	1.359
1886	57.4912	224.94	304.562	0.217623	0.688876	1.16913	29.192	5.58779	0.17897	1.51013	1.12
1887	59.0912	220.552	317.294	0.220858	0.886062	1.27861	30.9157	6.18351	0.202979	1.95249	0.713
1888	67.2004	196.294	358.555	0.223675	0.867493	1.2824	37.4003	5.50345	0.143885	1.88541	0.913
1889	23.2992	193.807	125.32	0.170319	0.385472	0.826922	30.9553	6.16517	0.161034	2.08468	0.682
1890	17.277	213.814	163.17	0.143083	0.39532	0.968706	41.84	6.34696	0.184115	1.78012	0.706
1891	13.087	210.28	99.8211	0.147866	0.30376	1.11301	30.9314	6.66847	0.165734	1.62601	0.889
1892	13.824	228.407	79.0059	0.178835	0.357933	0.839653	44.1806	5.50779	0.215971	1.57079	1.035
1893	13.5911	215.835	63.3542	0.126356	0.200962	0.753147	16.1833	5.35163	0.194132	1.38467	1.161
1894	26.5609	228.819	143.814	0.246733	0.489606	1.0451	39.214	5.23818	0.250868	1.9055	0.804
1895	21.0721	234.945	81.983	0.207794	0.384406	0.985514	38.9633	5.53864	0.250244	1.7766	0.809
1896	88.6627	219.796	498.265	0.268085	1.25127	1.80949	20.0213	5.44266	0.217681	1.77768	0.901
1897	88.589	217.022	472.231	0.264304	1.31566	1.83462	24.3244	5.61793	0.210778	1.866	0.787
1898	28.8271	221.535	122.874	0.145828	0.489758	1.07495	15.8226	5.1056	0.20936	1.46204	1.22
1899	27.4501	213.124	107.085	0.151542	0.557076	1.12749	31.2675	4.979	0.201166	1.50875	1.27
1900	28.6035	218.843	132.362	0.171997	0.335629	1.22541	31.9828	5.27805	0.182975	1.78558	0.728
1901	28.9775	238.857	80.8728	0.164431	0.362762	1.15769	31.4514	5.51404	0.227694	2.16857	0.802
1902	21.9446	214.855	189.511	0.156307	0.181794	0.73784	38.2431	4.84576	0.219505	2.16358	0.83
1903	21.6044	199.863	163.058	0.163818	0.389941	1.00278	23.3119	4.96907	0.212964	2.60149	1.104
1904	35.1836	215.672	144.217	0.188598	0.393561	1.75104	30.3863	4.69993	0.219182	2.45634	1.225
1905	20.3629	195.871	52.3652	0.16585	0.393647	0.967787	22.4827	4.54018	0.203018	2.63558	0.92
1906	30.646	156.701	149.077	0.202853	0.497911	1.15442	29.602	3.96353	0.15754	2.86734	1.297
1907	66.3816	188.408	318.757	0.236591	0.580148	1.49911	29.1378	4.25442	0.190748	2.84857	1.07
1908	33.7036	193.145	141.833	0.188275	0.345876	1.41339	21.3039	4.59291	0.229526	3.65391	0.868
1909	22.1438	210.441	122.696	0.174987	0.339071	1.40628	49.4046	4.37893	0.234823	2.70299	1.033
1910	18.6213	195.334	73.7399	0.176846	0.210937	0.929772	20.4265	4.44139	0.212801	4.02218	1.008
1911	20.0738	187.149	54.0034	0.160947	0.372273	2.40837	12.7472	3.87519	0.194356	2.80159	1.416
1912	22.1627	186.678	70.7129	0.179064	0.286555	1.20821	21.3799	3.83191	0.177467	2.99646	1.419
1913	13.508	181.303	90.6152	0.185573	0.25412	0.999016	21.0294	4.00779	0.190264	3.62101	1.141
1914	10.8489	170.631	17.3816	0.160866	0.133019	0.729709	16.4692	3.75994	0.198987	3.42523	1.189
1915	14.5208	194.791	46.4988	0.200966	0.236968	1.08704	27.4729	4.21679	0.223534	3.53275	0.747
1916	6.64997	205.667	29.7072	0.185319	0.202381	1.08724	36.7948	4.76081	0.233355	5.34381	0.614
1917	11.6749	180.268	12.9156	0.197391	0.21526	1.04551	31.9633	4.54164	0.225432	6.79431	0.723
1918	5.67311	193.428	1.32511	0.165308	0.354685	1.18281	24.6415	4.78679	0.235134	4.68708	0.792
1919	19.6427	166.364	206.747	0.165126	0.268597	1.27195	17.4709	3.57754	0.198901	3.88018	1.023
1920	8.97289	167.559	14.0942	0.185124	0.243783	1.20815	26.1421	4.04879	0.233558	7.13348	0.926
1921	31.1225	163.086	86.0484	0.203069	0.31165	1.86338	27.4103	4.03945	0.246136	6.63862	0.845
1922	11.279	160.002	19.5933	0.169615	0.318323	1.27381	27.618	3.85254	0.215874	7.40297	1.033
1923	16.092	153.068	49.4859	0.252898	0.311422	1.33043	25.1322	3.86471	0.218737	7.30015	1.156
1924	18.984	183.919	45.1663	0.225739	0.331488	1.5211	31.9344	4.11209	0.255802	7.41774	0.953
1925	15.1511	181.565	33.8178	0.211575	0.246005	1.51046	26.3154	3.98706	0.224979	6.6437	1.03
1926	33.0136	194.174	367.158	0.244715	0.437845	2.66167	46.12	4.20357	0.244715	7.03383	0.753
1927	34.4127	168.639	110.826	0.191459	0.652879	2.32757	41.8814	3.45378	0.241203	6.36324	0.849
1928	38.1542	174.575	162.226	0.223597	0.457828	1.73613	22.8076	3.66395	0.24593	6.65924	0.801
1929	13.2999	167.632	42.1696	0.187186	0.311254	1.46904	31.1782	3.66489	0.274954	6.18201	0.8
1930	44.5455	179.798	163.031	0.240643	0.586129	1.38819	42.5782	3.69446	0.257813	6.56214	0.741
1931	15.0777	172.028	22.4195	0.187292	0.358998	1.12666	31.5451	3.3377	0.228501	5.64015	0.96
1932	17.8304	181.433	53.4456	0.189631	0.341176	1.30212	33.8739	3.83817	0.251954	6.77639	0.96
1933	18.1106	156.435	94.662	0.175318	0.734788	1.34905	41.2932	3.12672	0.224948	5.65207	0.974
1934	21.3336	201.986	51.7405	0.246345	0.405488	1.33964	29.7453	4.01863	0.297848	7.43203	0.811
1935	23.1465	165.175	301.309	0.185594	0.335507	1.60218	17.5462	3.25095	0.233523	5.7124	1.203
1936	19.4778	173.226	297.359	0.18349	0.356711	1.33983	26.7006	3.58143	0.241861	7.04423	0.765
1937	15.2854	171.454	89.2252	0.190255	0.437532	1.24735	27.0949	3.75493	0.269208	7.69217	0.838
1938	25.1858	201.404	48.6538	0.234104	0.406484	1.55894	37.9328	4.3027	0.312014	8.12515	0.7
1939	49.6291	188.283	150.865	0.278027	0.563597	1.7357	31.1264	4.16595	0.285227	8.1989	0.767
1940	15.779	174.865	147.676	0.191815	0.370217	1.25203	38.5307	3.80733	0.272297	6.81038	0.833
1941	36.2475	163.935	101.786	0.223989	0.540129	1.81108	30.2944	3.54094	0.256748	6.69169	0.936
1942	20.5658	153.752	53.261	0.200321	0.608901	1.26993	27.9166	3.37449	0.201908	5.46979	0.89
1943	15.0052	152.972	78.0632	0.187576	0.406907	0.938686	27.6156	3.26791	0.188383	5.68459	0.773
1944	15.6539	162.292	85.4537	0.184423	0.432091	1.44987	48.419	3.53459	0.220298	6.03812	0.852
1945	13.4929	156.663	76.7375	0.201513	0.499924	1.18326	27.7474	3.72361	0.209499	5.79464	0.862
1946	22.7086	151.471	297.888	0.195098	0.645733	1.24269	26.7001	3.04232	0.23327	4.41516	0.859
1947	29.573	149.41	139.647	0.188645	0.620779	1.94712	24.1993	3.01699	0.206131	4.60696	0.815
1948	37.556	145.3	155.115	0.219641	0.629361	1.48251	29.5893	3.08431	0.205638	4.93065	0.826
1949	19.7704	151.652	70.0014	0.194514	0.520114	1.31984	30.521	3.41061	0.224643	4.98707	0.617
1950	41.6243	155.738	269.955	0.258744	0.619955	1.86645	24.9313	3.82935	0.262179	5.5796	0.755
1951	26.7841	146.531	162.678	0.213013	0.525152	1.2272	21.5557	3.66473	0.220131	5.22067	0.755
1952	31.1821	141.161	92.6232	0.203407	0.583552	1.87667	22.6636	3.47752	0.216741	4.06918	0.874
1953	17.6509	138.584	50.0507	0.152957	0.451786	1.01586	13.9747	3.02686	0.179718	2.56511	0.891
1954	22.92	159.065	121.895	0.176232	0.489682	1.11207	13.5717	3.05567	0.192953	3.13237	0.853
1955	24.3432	150.861	56.7903	0.170105	0.477136	1.10647	19.8873	3.03003	0.181954	3.40631	0.896
1956	21.1172	144.715	81.2069	0.213066	0.46864	1.22951	25.022	2.66731	0.187562	2.93139	1.092
1957	20.2376	135.026	49.173	0.154859	0.469383	1.35101	17.5938	2.48922	0.166874	2.51352	1.139
1958	21.3605	124.601	73.8483	0.102103	0.448578	1.03761	23.8399	2.29472	0.16352	2.42559	1.059
1959	8.49292	121.898	18.3871	0.084415	0.345634	0.894744	15.3391	2.53465	0.173504	2.96552	1.26
1960	24.2986	130.412	148.812	0.150814	0.981492	1.21092	15.4664	2.59873	0.162847	2.39577	1.044
1961	20.948	129.116	119.369	0.160047	0.739922	1.13649	12.3701	2.5643	0.160835	2.53119	1.301
1962	35.5124	125.487	167.621	0.165211	0.937132	1.33893	41.6076	2.46814	0.171627	2.41361	1.227
1963	17.3802	120.774	106.168	0.236536	0.856354	1.32389	24.5712	2.38157	0.141605	1.95676	0.989
1964	17.6234	117.333	81.5791	0.152116	1.14323	1.53574	16.3623	2.55799	0.145811	3.19956	0.829
1965	27.2155	114.045	171.669	0.134999	0.838353	1.21939	16.7671	2.23548	0.149378	2.38725	0.981
1966	18.1854	115.167	80.3823	0.0842287	0.78092	0.952587	8.67957	2.15345	0.132359	2.09008	0.866
1967	12.4417	129.088	78.0931	0.142487	0.945269	0.859299	33.8068	2.63839	0.153631	2.71083	0.795
1968	33.0012	137.652	169.221	0.162067	1.04589	1.36525	17.4381	2.57599	0.151739	2.42822	1.028
1969	19.1962	122.161	113.78	0.123043	0.798611	1.06572	18.5187	2.29927	0.158087	2.03449	1.092
1970	22.8354	128.794	135.911	0.138633	0.896828	1.17176	18.7388	2.47553	0.162777	1.86025	1.044
1971	15.7029	93.5392	113.09	0.133774	0.7937	0.749368	35.9635	2.01478	0.111219	1.60179	0.927
1972	14.9174	127.737	109.277	0.125629	0.875846	1.00938	35.5395	2.4308	0.150123	1.89036	1.031
1973	14.2551	134.121	107.978	0.134467	0.816008	1.29705	22.1871	2.42961	0.16008	2.17669	0.985
1974	16.1671	131.278	91.4993	0.138463	0.827235	1.0428	22.2799	2.45732	0.156557	2.56195	1.119
1975	18.0618	128.201	105.504	0.147525	0.781083	1.16624	24.0744	2.39987	0.145132	2.22364	1.205
1976	21.9275	117.931	88.664	0.132384	0.412243	1.24917	25.2151	2.28203	0.150388	1.77368	1.112
1977	29.3122	116.428	203.002	0.168634	0.934251	1.56663	45.0063	2.64923	0.159885	2.76139	1.133
1978	30.4501	131.026	150.053	0.144104	0.538396	1.37883	15.3343	2.03394	0.155803	1.47481	0.864
1979	41.6736	147.626	209.118	0.219004	1.03105	1.57424	50.1669	3.5492	0.160917	3.78704	1.044
1980	9.14996	138.114	69.8078	0.136431	0.407695	1.36431	29.5499	2.33665	0.135365	1.55804	0.941
1981	18.4569	125.608	131.737	0.158428	0.839274	1.42387	29.539	2.91944	0.152883	2.47584	1.202
1982	10.2393	118.632	116.441	0.165848	0.928187	1.13329	26.1992	2.58266	0.150625	2.95602	1.474
1983	17.4579	112.975	89.0639	0.140864	0.887136	1.13654	19.6902	2.07794	0.133936	1.82623	1.143
1984	18.4222	109.051	88.6934	0.139489	0.523686	1.32823	20.341	2.08591	0.152876	2.46422	0.937
1985	19.71	113.883	182.827	0.211454	0.933408	2.22837	39.5512	2.83264	0.193704	3.02171	0.895
1986	21.0768	97.235	132.082	0.139274	0.856149	1.86898	22.8255	2.27597	0.18183	2.63731	0.768
1987	20.2579	108.963	135.482	0.132446	0.987362	1.78922	21.1674	2.31821	0.149201	2.25278	1.157
1988	20.485	96.0772	132.461	0.112225	0.972484	1.78177	27.6611	2.18483	0.131192	2.38557	0.918
1989	25.3801	107.14	166.212	0.131834	1.03567	1.93991	33.2659	2.46724	0.157716	2.72444	0.863
1990	25.6387	99.563	121.391	0.143428	0.873936	2.01406	34.3416	2.45407	0.165306	2.68582	0.736
1991	23.6715	99.927	153.758	0.147708	1.01214	2.1035	30.3299	2.19381	0.146177	2.41039	0.57
1992	22.2283	108.692	174.029	0.12827	0.827891	1.46924	29.6273	2.16925	0.146259	1.97059	1.094
1993	39.0259	113.617	191.551	0.178701	1.26037	2.46434	28.3203	2.34246	0.147407	2.17611	0.677
1994	14.4406	102.94	76.6922	0.117493	0.856193	1.71675	26.8091	2.23277	0.138134	2.12321	1.048
1995	23.3804	111.665	161.967	0.139513	1.08042	1.62644	26.6357	2.46753	0.145125	2.10111	0.777
1996	33.2684	89.9306	178.263	0.166342	0.620265	1.66797	38.7386	2.57747	0.139032	2.39706	0.766
1997	22.0179	93.6594	132.19	0.135981	0.726946	1.59976	28.0264	2.33342	0.148631	2.22669	0.825
1998	42.7118	100.593	224.564	0.156574	0.829431	1.75816	30.0952	2.31441	0.135972	1.97572	0.841
1999	14.3099	89.8589	161.159	0.102611	0.488	1.39798	33.4004	2.27376	0.110566	1.95956	1.018
2000	13.968	89.5744	90.324	0.116	0.4884	1.6852	22.568	2.3308	0.1256	1.6244	0.854
2001	20.6558	80.0926	146.433	0.151727	0.533453	1.47593	24.5894	2.06919	0.102757	1.23429	1.031
2002	15.8709	80.6076	88.3819	0.117734	0.566595	1.61458	21.6956	1.95849	0.0991445	1.5929	0.996
2003	17.6597	83.7137	122.197	0.122735	0.696686	1.66386	23.707	2.16489	0.108767	1.82242	0.71
2004	19.4485	86.8197	156.013	0.127736	0.826777	1.71314	25.7185	2.37129	0.118389	2.05195	0.842
2005	83.3072	83.2336	367.752	0.213547	1.42324	4.4041	34.4634	2.43739	0.115171	1.95271	0.865
2006	40.4065	62.3883	209.464	0.143046	1.15183	2.01796	28.1768	1.99674	0.0951018	1.56132	0.696
2007	8.19099	71.0407	86.5093	0.118511	0.798541	1.40964	21.719	1.96914	0.0814262	1.6249	0.954
2008	29.0816	64.3346	156.806	0.127937	1.63239	2.36483	29.2655	1.87547	0.0863573	1.39491	1.137
2009	32.4656	69.0663	166.517	0.129573	0.922703	1.88605	23.4358	2.01884	0.0877232	1.43938	1.106
2010	30.8943	71.2569	232.985	0.11994	0.996756	1.87788	26.426	2.00096	0.0744725	1.46397	0.969
2011	27.3639	68.5427	204.323	0.122655	1.0853	2.02064	27.5538	2.33717	0.0759669	1.45564	0.821
2012	22.2811	69.0843	122.582	0.123695	0.916544	1.55497	27.2848	2.16387	0.0750153	1.38579	0.905
2013	20.1096	61.4923	114.835	0.111773	1.02841	1.74108	17.2149	2.27033	0.0783366	1.35799	0.848
2014	10.5525	44.4495	105.449	0.0975442	0.754815	2.029	15.9618	2.00449	0.0507875	1.37328	1.134
2015	19.326	40.079	162.39	0.0952411	0.753595	1.6568	22.1991	1.80601	0.0428585	0.946458	1.301
2016	14.9227	42.7154	199.954	0.100969	0.964769	1.75582	21.6487	1.78524	0.0484968	0.834384	1.176
